# Supplementary material for: Thermally-derived liquid phase involving multiphase Cu(In,Ga)Se2 nanoparticles for solution-processed inorganic photovoltaic devices
Source: Royal Society of Chemistry journal article supplement (doi:10.1039/c4ra00623b), 2014-01-01
Supplement: c4ra00623b1.pdf [file c4ra00623b1.pdf]

**Supporting Information for**

**Thermally-derived liquid phase involving multiphase  
Cu(In,Ga)Se<sub>2</sub> nanoparticles for solution-processed  
inorganic photovoltaic devices**

Yeong-Hui Seo, Yejin Jo, Youngmin Choi, KyungHoon Yoon, Beyong-Hwan Ryu, SeJin

Ahn and Sunho Jeong

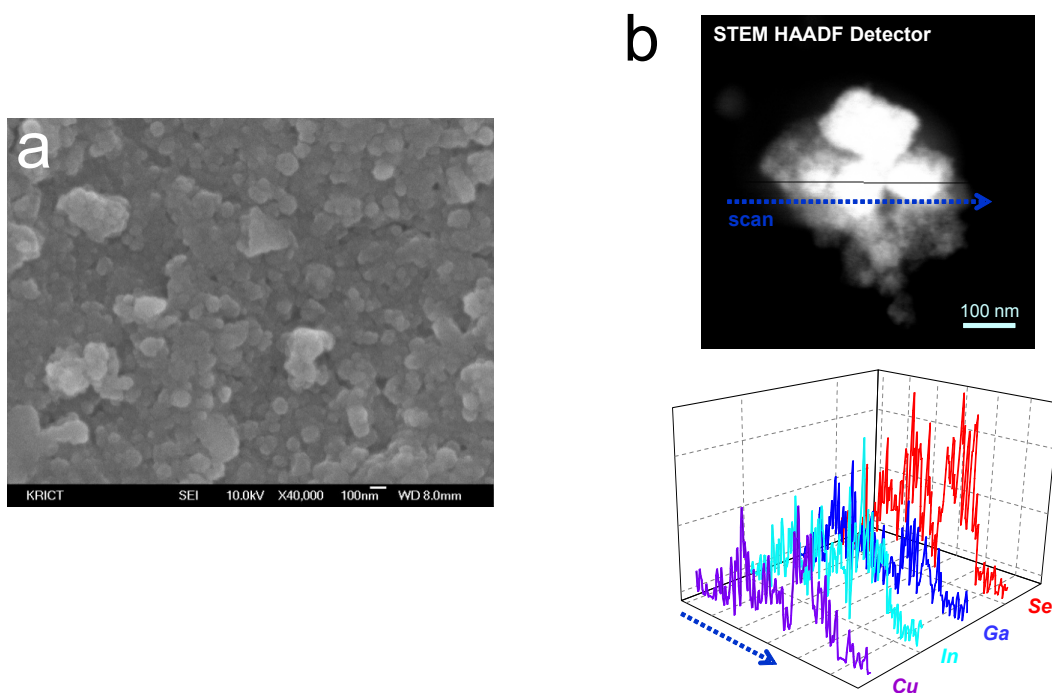

**Figure S1.** (a) SEM image, (b) STEM image and TEM-EDS compositional profiles for as-synthesized multiphase, stoichiometric CIGSe nanoparticles.

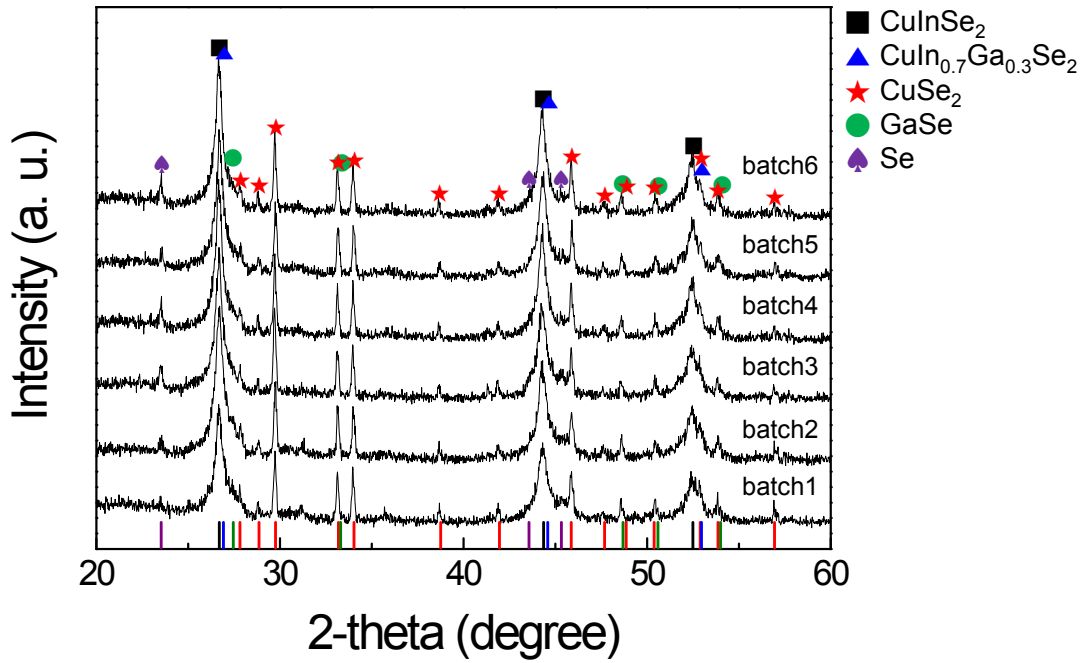

**Figure S2.** XRD spectra for as-synthesized multiphase, stoichiometric CIGSe nanoparticles by multiple experiments under same synthetic condition for proving reproducibility of multiphase CIGSe nanoparticles.

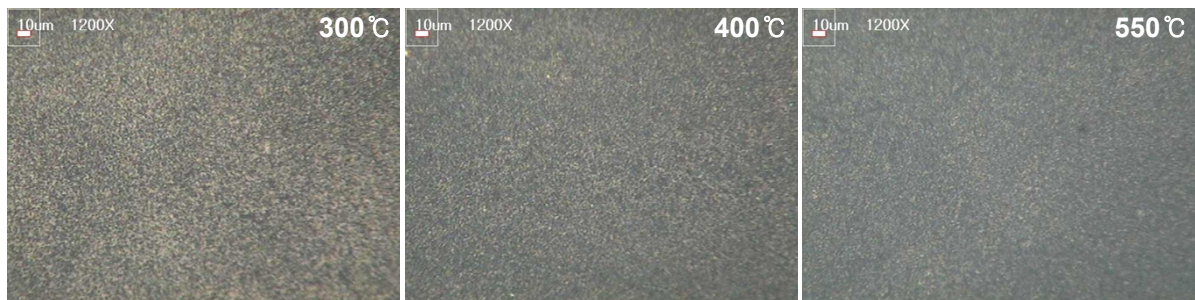

**Figure S3.** Top-view optical microscope images for the solution-processed multiphase CIGSe-based particulate films selenized at (a) 300, (b) 400, and (b) 550 °C. All scale bars are 10 $\mu$ m.

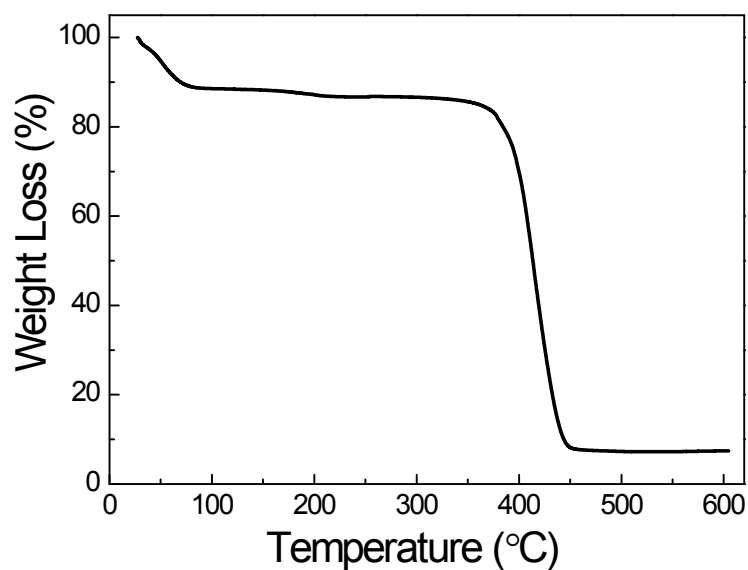

**Figure S4.** TGA results for PVP under an oxygen free atmosphere (nitrogen). The heating rate was 5 °C/min. The weight loss below 90 °C is due to the evaporation of absorbed water and the weight loss above 100 °C is attributed to the thermal decomposition of PVP.

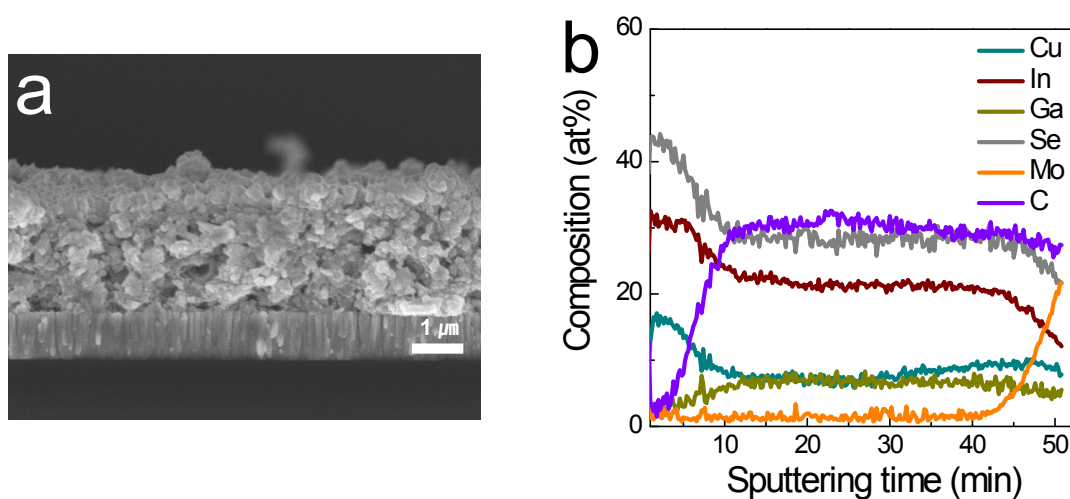

**Figure S5.** (a) Cross-sectional SEM image and (b) AES depth profile for the solution-processed multiphase CIGSe-based particulate films selenized at 550 °C.
